# Supplementary material
Source: publisher figshare collection journal article supplement (https://frontiersin.figshare.com/ndownloader/files/13236320)
Supplement: Supplementary file [file 13236320]

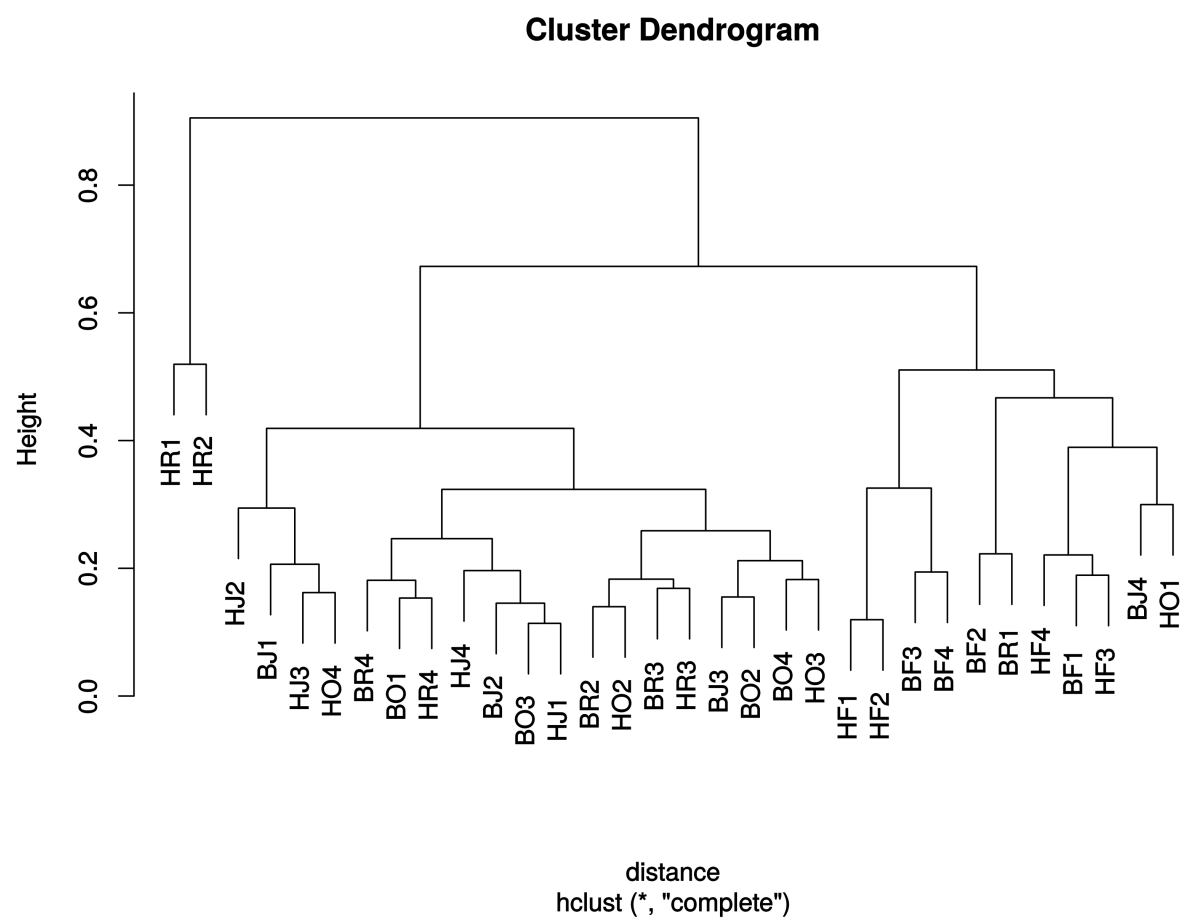

**Figure S3.** Clustering analysis of used samples on core plot level. Cluster analysis was performed by using hclust.
